# Supplementary material for: Solution-based synthesis of lithium thiophosphate superionic conductors for solid-state batteries: a chemistry perspective
Source: Royal Society of Chemistry journal article supplement (doi:10.1039/c9ta04772g), 2019-01-01
Supplement: c9ta04772g1.pdf [file c9ta04772g1.pdf]

Supporting Information

**Solution-Based Synthesis of Lithium Thiophosphate Superionic Conductors for  
Solid-State Batteries: A Chemistry Perspective**

Michael Ghidui,<sup>a,b</sup> Justine Ruhl,<sup>a,b</sup> Sean P. Culver,<sup>a,b</sup> Wolfgang G. Zeier<sup>\*a,b</sup>

<sup>a</sup>*Institute of Physical Chemistry, Justus-Liebig-University Gießen, Heinrich-Buff-Ring 17, D-35392 Gießen, Germany.*

<sup>b</sup>*Center for Materials Research (LaMa), Justus-Liebig-University Gießen, Heinrich-Buff-Ring 16, D-35392 Gießen,  
Germany.*

Tabulation of conductivity values presented in Figure 15 of the main text

| Composition                                         | Solvent           | Processing Details                 | $\sigma_{\text{ion}}$ (S·cm <sup>-1</sup> ) | Reference |
|-----------------------------------------------------|-------------------|------------------------------------|---------------------------------------------|-----------|
| 80Li <sub>2</sub> S-20P <sub>2</sub> S <sub>5</sub> | NMF               | Solution processing                | 2.6·10 <sup>-6</sup>                        | 1         |
| 80Li <sub>2</sub> S-20P <sub>2</sub> S <sub>5</sub> | --                | Ball milling                       | 2.3·10 <sup>-4</sup>                        | 1         |
| Li <sub>3</sub> PS <sub>4</sub>                     | --                | Extrapolated from high-temp. phase | 8.93·10 <sup>-7</sup>                       | 2         |
| Li <sub>3</sub> PS <sub>4</sub>                     | THF               | Solution synthesis                 | 1.6·10 <sup>-4</sup>                        | 2         |
| Li <sub>3</sub> PS <sub>4</sub>                     | NMF / hexane      | Solution synthesis                 | 2.3·10 <sup>-6</sup>                        | 3         |
| Li <sub>3</sub> PS <sub>4</sub>                     | ACN               | Solution synthesis                 | 1.2·10 <sup>-4</sup>                        | 4         |
| Li <sub>3</sub> PS <sub>4</sub>                     | EP                | Solvo-mechanical                   | 2.0·10 <sup>-4</sup>                        | 5         |
| Li <sub>3</sub> PS <sub>4</sub>                     | DMC               | Solvo-mechanical                   | 6.0·10 <sup>-6</sup>                        | 6         |
| Li <sub>3</sub> PS <sub>4</sub>                     | EA                | Solvo-mechanical                   | 2.0·10 <sup>-4</sup>                        | 6         |
| Li <sub>3</sub> PS <sub>4</sub>                     | MPK               | Solvo-mechanical                   | 3.0·10 <sup>-7</sup>                        | 6         |
| Li <sub>3</sub> PS <sub>4</sub>                     | DMC               | Solvo-mechanical                   | 3.3·10 <sup>-4</sup>                        | 7         |
| Li <sub>7</sub> P <sub>3</sub> S <sub>11</sub>      | DME               | Solution synthesis                 | 2.7·10 <sup>-4</sup>                        | 8         |
| Li <sub>7</sub> P <sub>3</sub> S <sub>11</sub>      | --                | High temp. synthesis               | 4.1·10 <sup>-3</sup>                        | 9         |
| Li <sub>7</sub> P <sub>3</sub> S <sub>11</sub>      | ACN               | Solution synthesis                 | 1.0·10 <sup>-3</sup>                        | 10        |
| Li <sub>7</sub> P <sub>3</sub> S <sub>11</sub>      | ACN               | Solution synthesis                 | 8.7·10 <sup>-4</sup>                        | 11        |
| Li <sub>7</sub> P <sub>3</sub> S <sub>11</sub>      | ACN               | Solution synthesis                 | 9.7·10 <sup>-4</sup>                        | 12        |
| Li <sub>7</sub> P <sub>3</sub> S <sub>11</sub>      | DME               | Solvo-mechanical                   | 1.0·10 <sup>-4</sup>                        | 13        |
| Li <sub>7</sub> PS <sub>6</sub>                     | 1. ACN 2. Ethanol | Solution synthesis                 | 1.1·10 <sup>-4</sup>                        | 14        |
| Li <sub>7</sub> PS <sub>6</sub>                     | --                | High temp. synthesis               | 1.6·10 <sup>-6</sup>                        | 15        |
| Li <sub>6</sub> PS <sub>5</sub> Cl                  | Ethanol           | Solution processing                | 1.4·10 <sup>-5</sup>                        | 16        |
| Li <sub>6</sub> PS <sub>5</sub> Cl                  | --                | Ball milling                       | 1.4·10 <sup>-3</sup>                        | 16        |
| Li <sub>6</sub> PS <sub>5</sub> Cl                  | Ethanol           | Solution processing                | 3.0·10 <sup>-4</sup>                        | 17        |
| Li <sub>6</sub> PS <sub>5</sub> Cl                  | 1. THF 2. Ethanol | Solution synthesis                 | 2.4·10 <sup>-3</sup>                        | 18        |
| Li <sub>6</sub> PS <sub>5</sub> Cl                  | Ethanol           | Solution processing                | 1.4·10 <sup>-5</sup>                        | 19        |
| Li <sub>6</sub> PS <sub>5</sub> Cl                  | --                | Ball milling                       | 9.5·10 <sup>-4</sup>                        | 19        |
| Li <sub>6</sub> PS <sub>5</sub> Cl                  | --                | High temp. synthesis               | 1.97·10 <sup>-3</sup>                       | 20        |
| Li <sub>6</sub> PS <sub>5</sub> Br                  | 1. THF 2. Ethanol | Solution synthesis                 | 1.4·10 <sup>-3</sup>                        | 21        |
| Li <sub>6</sub> PS <sub>5</sub> Br                  | MC                | Ball milling                       | 1.2·10 <sup>-3</sup>                        | 21        |
| Li <sub>6</sub> PS <sub>5</sub> Br                  | 1. THF 2. Ethanol | Solution synthesis                 | 1.9·10 <sup>-3</sup>                        | 18        |
| Li <sub>6</sub> PS <sub>5</sub> Br                  | Ethanol           | Solution processing                | 5.5·10 <sup>-5</sup>                        | 19        |
| Li <sub>6</sub> PS <sub>5</sub> Br                  | --                | Ball milling                       | 8.2·10 <sup>-4</sup>                        | 19        |
| Li <sub>6</sub> PS <sub>5</sub> Br                  | --                | High temp. synthesis               | 1.12·10 <sup>-3</sup>                       | 20        |
| Li <sub>6</sub> PS <sub>5</sub> I                   | 1. THF 2. Ethanol | Solution synthesis                 | 2.0·10 <sup>-6</sup>                        | 18        |
| Li <sub>6</sub> PS <sub>5</sub> I                   | Ethanol           | Solution processing                | 1.9·10 <sup>-5</sup>                        | 19        |
| Li <sub>6</sub> PS <sub>5</sub> I                   | --                | Ball milling                       | 3.7·10 <sup>-4</sup>                        | 19        |
| Li <sub>6</sub> PS <sub>5</sub> I                   | --                | High temp. synthesis               | 1.0·10 <sup>-6</sup>                        | 20        |

- 1 S. Teragawa, K. Aso, K. Tadanaga, A. Hayashi and M. Tatsumisago, *Chem. Lett.*, 2013, **42**, 1435–1437.
- 2 Z. Liu, W. Fu, E. A. Payzant, X. Yu, Z. Wu, N. J. Dudney, J. Kiggans, K. Hong, A. J. Rondinone and C. Liang, *J. Am. Chem. Soc.*, 2013, **135**, 975–978.
- 3 S. Teragawa, K. Aso, K. Tadanaga, A. Hayashi and M. Tatsumisago, *J. Mater. Chem. A*, 2014, **2**, 5095.

- 4 H. Wang, Z. D. Hood, Y. Xia and C. Liang, *J. Mater. Chem. A*, 2016, **4**, 8091–8096.
- 5 N. H. H. Phuc, K. Morikawa, T. Mitsuhiro, H. Muto and A. Matsuda, *Ionics (Kiel)*, 2017, **23**, 2061–2067.
- 6 A. Matsuda, H. Muto and N. H.H. Phuc, *J. Japan Soc. Powder Powder Metall.*, 2016, **63**, 976–980.
- 7 N. H. H. Phuc, K. Morikawa, M. Totani, H. Muto and A. Matsuda, *Solid State Ionics*, 2016, **285**, 2–5.
- 8 S. Ito, M. Nakakita, Y. Aihara, T. Uehara and N. Machida, *J. Power Sources*, 2014, **271**, 342–345.
- 9 K. Minami, A. Hayashi and M. Tatsumisago, *J. Ceram. Soc. Japan*, 2010, **118**, 305–308.
- 10 M. Calpa, N. C. Rosero-Navarro, A. Miura and K. Tadanaga, *RSC Adv.*, 2017, **7**, 46499–46504.
- 11 Y. Wang, D. Lu, M. Bowden, P. Z. El Khoury, K. S. Han, Z. D. Deng, J. Xiao, J. G. Zhang and J. Liu, *Chem. Mater.*, 2018, **30**, 990–997.
- 12 R. C. Xu, X. H. Xia, Z. J. Yao, X. L. Wang, C. D. Gu and J. P. Tu, *Electrochim. Acta*, 2016, **219**, 235–240.
- 13 B. Xue, B. Fan, B. Li, L. Chen, F. Wang, Z. Luo, X. Zhang and H. Ma, *J. Am. Ceram. Soc.*, 2018, **102**, 3402–3410.
- 14 D. A. Ziolkowska, W. Arnold, T. Druffel, M. K. Sunkara and H. Wang, *ACS Appl. Mater. Interfaces*, 2019, **11**, 6015–6021.
- 15 H. J. Deiseroth, J. Maier, K. Weichert, V. Nickel, S. T. Kong and C. Reiner, *Zeitschrift für Anorg. und Allg. Chemie*, 2011, **637**, 1287–1294.
- 16 S. Yubuchi, S. Teragawa, K. Aso, K. Tadanaga, A. Hayashi and M. Tatsumisago, *J. Power Sources*, 2015, **293**, 941–945.
- 17 N. C. Rosero-Navarro, A. Miura and K. Tadanaga, *J. Power Sources*, 2018, **396**, 33–40.
- 18 L. Zhou, K.-H. Park, X. Sun, F. Lalere, T. Adermann, P. Hartmann and L. F. Nazar, *ACS Energy Lett.*, 2019, **4**, 265–270.
- 19 S. Yubuchi, M. Uematsu, M. Deguchi, A. Hayashi and M. Tatsumisago, *ACS Appl. Energy Mater.*, 2018, **1**, 3622–3629.
- 20 M. A. Kraft, S. P. Culver, M. Calderon, F. Böcher, T. Krauskopf, A. Senyshyn, C. Dietrich, A. Zevalkink, J. Janek and W. G. Zeier, *J. Am. Chem. Soc.*, 2017, **139**, 10909–10918.
- 21 S. Yubuchi, M. Uematsu, C. Hotehama, A. Sakuda, A. Hayashi and M. Tatsumisago, *J. Mater. Chem. A*, 2018, **7**, 558–566.
